# Supplementary material for: The Interpersonal Mindfulness in Parenting Scale: Psychometric Properties of the Italian Version
Source: Springer Nature journal article supplement (doi:10.1007/s12671-025-02707-4), 2025-12-01
Supplement: MOESM1 [file 12671_2025_2707_MOESM1_ESM.docx]

**Supplementary 1**. Italian Translation of the Interpersonal Mindfulness in Parenting Original Scale (IM-P-IT)

|  | Items | Dimensions Original Scale | Dimensions Italian Validation |
| --- | --- | --- | --- |
| *1* | *Mi ritrovo ad ascoltare mio figlio con un orecchio perché sono occupato a fare o pensare ad altre cose nello stesso tempo.* | *Listening with Full Attention* | *Listening with Full Attention* |
| 2 | Quando mi arrabbio con mio figlio, tengo conto di come mi sento prima di agire | Self-Regulation in the Parenting Relationship | Self-Regulation in the Parenting Relationship |
| 3 | Noto come i cambiamenti di umore di mio figlio influenzano il mio umore. | Emotional Awareness of Self and Child |  |
| 4 | Ascolto con attenzione le idee di mio figlio anche se non mi trovo d’accordo con queste. | Non-Judgmental Acceptance of Self and Child |  |
| *5* | *Reagisco spesso troppo in fretta a quello che dice o fa mio figlio.* | *Self-Regulation in the Parenting Relationship* | *Emotional Non-Reactivity in Parenting* |
| 6 | Sono consapevole di come i miei stati d'animo influenzano il modo in cui tratto mio figlio. | Emotional Awareness of Self and Child |  |
| 7 | Anche quando mi fa sentire a disagio, permetto a mio figlio di esprimere i suoi stati d'animo. | Non-Judgmental Acceptance of Self and Child |  |
| 8 | Quando mi arrabbio con mio figlio, gli comunico in modo sereno come mi sento | Self-Regulation in the Parenting Relationship | Self-Regulation in the Parenting Relationship |
| *9* | *Mi affretto nelle attività con mio figlio senza far veramente attenzione a lui.* | *Listening with Full Attention* | *Listening with Full Attention* |
| *10* | *Ho delle difficoltà nell’accettare la crescente autonomia di mio figlio.* | *Non-Judgmental Acceptance of Self and Child* |  |
| *11* | *I miei stati d'animo tendono ad influenzare le mie decisioni di genitore, ma me ne accorgo solo dopo.* | *Emotional Awareness of Self and Child* | *Emotional Non-Reactivity in Parenting* |
| *12* | *È difficile per me comprendere cosa prova mio figlio.* | *Emotional Awareness of Self and Child* | *Emotional Awareness and Compassion for the Child* |
| *13* | *Quando faccio delle attività con mio figlio, la mia mente vaga e mi distraggo facilmente.* | *Listening with Full Attention* | *Listening with Full Attention* |
| *14* | *Quando mio figlio si comporta male, mi arrabbio così tanto che dico o faccio cose di cui poi mi pento.* | *Self-Regulation in the Parenting Relationship* | *Emotional Non-Reactivity in Parenting* |
| *15* | *Tendo ad essere duro con me stesso quando come genitore commetto degli errori.* | *Compassion for Self and Child* |  |
| 16 | Quando mio figlio fa qualcosa che mi fa arrabbiare, cerco di mantenere un equilibrio nelle mie emozioni. | Self-Regulation in the Parenting Relationship | Self-Regulation in the Parenting Relationship |
| *17* | *Quando ho delle grandi difficoltà con mio figlio, tendo a incolpare me stesso.* | *Compassion for Self and Child* | *Non-Judgmental Acceptance in Parenting* |
| 18 | Quando le cose che provo a fare come genitore non funzionano, le accetto e vado avanti. | Non-Judgmental Acceptance of Self and Child |  |
| *19* | *Spesso sono così occupato a pensare ad altre cose che mi rendo conto di non ascoltare veramente mio figlio.* | *Listening with Full Attention* | *Listening with Full Attention* |
| 20 | Quando faccio qualcosa da genitore che rimpiango, cerco di concedermi una pausa. | Compassion for Self and Child |  |
| 21 | Nelle situazioni di difficoltà con mio figlio, mi fermo senza reagire immediatamente. | Non-Judgmental Acceptance of Self and Child | Self-Regulation in the Parenting Relationship |
| 22 | Per me è facile comprendere quando mio figlio si preoccupa per qualcosa. | Emotional Awareness of Self and Child | Emotional Awareness and Compassion for the Child |
| *23* | *Tendo a criticarmi per non essere il tipo di genitore che vorrei essere.* | *Non-Judgmental Acceptance of Self and Child* | *Non-Judgmental Acceptance in Parenting* |
| 24 | Faccio molta attenzione a mio figlio quando trascorriamo del tempo insieme. | Listening with Full Attention | Listening with Full Attention |
| 25 | Sono gentile con mio figlio quando è arrabbiato. | Compassion for Self and Child |  |
| *26* | *Quando ho delle grandi difficoltà nel mio ruolo di genitore, penso che gli altri genitori affrontino questi problemi più facilmente.* | *Compassion for Self and Child* | *Non-Judgmental Acceptance in Parenting* |
| 27 | Quando mio figlio attraversa un periodo difficile, cerco di dargli la cura e l'affetto di cui ha bisogno. | Compassion for Self and Child | Emotional Awareness and Compassion for the Child |
| 28 | Cerco di capire il punto di vista di mio figlio anche quando la sua opinione non ha senso per me. | Non-Judgmental Acceptance of Self and Child | Emotional Awareness and Compassion for the Child |
| *29* | *Quando mio figlio fa qualcosa che mi fa arrabbiare, mi faccio trascinare dai miei stati d'animo.* | *Self-Regulation in the Parenting Relationship* | *Emotional Non-Reactivity in Parenting* |
| 30 | Riesco a capire cosa prova mio figlio anche quando non dice niente. | Emotional Awareness of Self and Child | Emotional Awareness and Compassion for the Child |
| 31 | Cerco di essere comprensivo e di avere pazienza con mio figlio quando attraversa un momento difficile. | Compassion for Self and Child | Emotional Awareness and Compassion for the Child |

Note. Items in italics should be reverse scored.

**Supplementary 2.** Interpersonal Mindfulness in Parenting Italian Scale (IM-P-IT). Italian translation and adaptation.

| Le seguenti dichiarazioni descrivono in vari modi l’interazione quotidiana dei genitori con i loro figli. Ti preghiamo di dirci se la dichiarazione è secondo te “Mai vera”, "Raramente vera", “Qualche volta vera", “Spesso vera” o “Sempre vera". Ricordati che non ci sono delle risposte giuste o sbagliate e ti preghiamo di rispondere secondo quello che veramente riflette la tua esperienza invece di quello che pensi la tua esperienza dovrebbe essere. Ti preghiamo di considerare ogni dichiarazione come separata dalle altre dichiarazioni. | | | | | | | | | |
| --- | --- | --- | --- | --- | --- | --- | --- | --- | --- |
| Items | Mai vera | Raramente vera | | Qualche volta vera | | Spesso vera | | Sempre vera | |
| Mi ritrovo ad ascoltare mio figlio con un orecchio perché sono occupato a fare o pensare ad altre cose nello stesso tempo. | [ ] | [ ] | [ ] | | [ ] | | [ ] | |
| Quando mi arrabbio con mio figlio, tengo conto di come mi sento prima di agire | [ ] | [ ] | [ ] | | [ ] | | [ ] | |
| Reagisco spesso troppo in fretta a quello che dice o fa mio figlio. | [ ] | [ ] | [ ] | | [ ] | | [ ] | |
| Quando mi arrabbio con mio figlio, gli comunico in modo sereno come mi sento | [ ] | [ ] | [ ] | | [ ] | | [ ] | |
| Mi affretto nelle attività con mio figlio senza far veramente attenzione a lui. | [ ] | [ ] | [ ] | | [ ] | | [ ] | |
| I miei stati d'animo tendono ad influenzare le mie decisioni di genitore, ma me ne accorgo solo dopo. | [ ] | [ ] | [ ] | | [ ] | | [ ] | |
| È difficile per me comprendere cosa prova mio figlio. | [ ] | [ ] | [ ] | | [ ] | | [ ] | |
| Quando faccio delle attività con mio figlio, la mia mente vaga e mi distraggo facilmente. | [ ] | [ ] | [ ] | | [ ] | | [ ] | |
| Quando mio figlio si comporta male, mi arrabbio così tanto che dico o faccio cose di cui poi mi pento. | [ ] | [ ] | [ ] | | [ ] | | [ ] | |
| Quando mio figlio fa qualcosa che mi fa arrabbiare, cerco di mantenere un equilibrio nelle mie emozioni. | [ ] | [ ] | [ ] | | [ ] | | [ ] | |
| Quando ho delle grandi difficoltà con mio figlio, tendo a incolpare me stesso. | [ ] | [ ] | [ ] | | [ ] | | [ ] | |
| Spesso sono così occupato a pensare ad altre cose che mi rendo conto di non ascoltare veramente mio figlio. | [ ] | [ ] | [ ] | | [ ] | | [ ] | |
| Nelle situazioni di difficoltà con mio figlio, mi fermo senza reagire immediatamente. | [ ] | [ ] | [ ] | | [ ] | | [ ] | |
| Per me è facile comprendere quando mio figlio si preoccupa per qualcosa. | [ ] | [ ] | [ ] | | [ ] | | [ ] | |
| Tendo a criticarmi per non essere il tipo di genitore che vorrei essere. | [ ] | [ ] | [ ] | | [ ] | | [ ] | |
| Faccio molta attenzione a mio figlio quando trascorriamo del tempo insieme. | [ ] | [ ] | [ ] | | [ ] | | [ ] | |
| Quando ho delle grandi difficoltà nel mio ruolo di genitore, penso che gli altri genitori affrontino questi problemi più facilmente. | [ ] | [ ] | [ ] | | [ ] | | [ ] | |
| Quando mio figlio attraversa un periodo difficile, cerco di dargli la cura e l'affetto di cui ha bisogno. | [ ] | [ ] | [ ] | | [ ] | | [ ] | |
| Cerco di capire il punto di vista di mio figlio anche quando la sua opinione non ha senso per me. | [ ] | [ ] | [ ] | | [ ] | | [ ] | |
| Quando mio figlio fa qualcosa che mi fa arrabbiare, mi faccio trascinare dai miei stati d'animo. | [ ] | [ ] | [ ] | | [ ] | | [ ] | |
| Riesco a capire cosa prova mio figlio anche quando non dice niente. | [ ] | [ ] | [ ] | | [ ] | | [ ] | |
| Cerco di essere comprensivo e di avere pazienza con mio figlio quando attraversa un momento difficile. | [ ] | [ ] | [ ] | | [ ] | | [ ] | |

È possibile richiede alle autrici le versioni del questionario italiano declinate al femminile, scrivendo alla prima autrice dell’articolo.
